# Supplementary material for: Nucleus of the Solitary Tract Serotonin 5-HT2C Receptors Modulate Food Intake
Source: PubMed Central journal article supplement (PMC6371983; doi:10.1016/j.cmet.2018.07.017), 2018-10-02
Supplement: mmc1.pdf [file mmc1.pdf]

**Cell Metabolism, Volume 28**

## **Supplemental Information**

### **Nucleus of the Solitary Tract**

#### **Serotonin 5-HT<sub>2C</sub> Receptors Modulate Food Intake**

**Giuseppe D'Agostino, David Lyons, Claudia Cristiano, Miriam Lettieri, Cristian Olarte-Sanchez, Luke K. Burke, Megan Greenwald-Yarnell, Celine Cansell, Barbora Doslikova, Teodora Georgescu, Pablo Blanco Martinez de Morentin, Martin G. Myers Jr., Justin J. Rochford, and Lora K. Heisler**

## Supplemental Figures

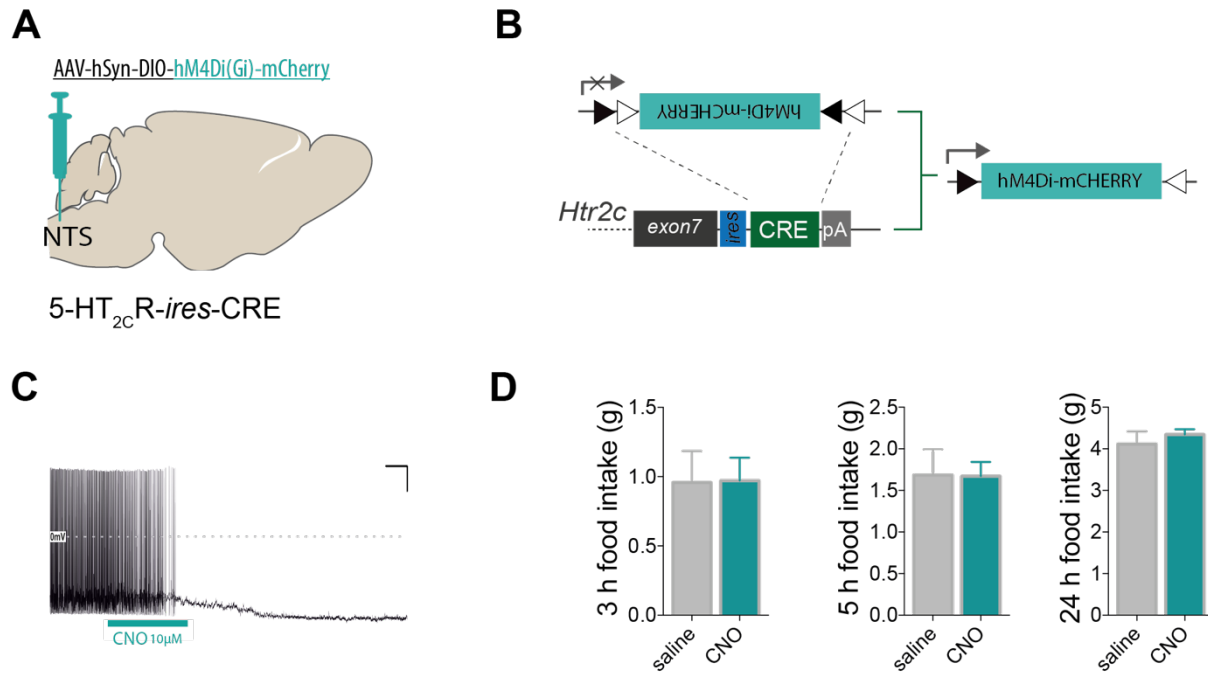

**Figure S1, related to Figure 1. (A)** Schematic of the strategy used to inhibit the activity of 5-HT<sub>2C</sub>R-expressing neurons within the NTS: 5-HT<sub>2C</sub>R<sup>CRE</sup> mice were stereotaxically injected into the NTS with a Cre-dependent DREADD vector (AAV-hM4Di-mCherry). **(B)** 5-HT<sub>2C</sub>R<sup>CRE</sup> construct and Cre-mediated recombination of DREADD allele within the NTS produced 5-HT<sub>2C</sub>R<sup>NTS</sup>-hM4Di mice. **(C)** Representative example of electrophysiological recording of an isolated hM4i-transduced 5-HT<sub>2C</sub>R-expressing neuron from the NTS of 5-HT<sub>2C</sub>R<sup>NTS</sup>-hM4Di mice illustrating that CNO (10 µM) caused a reduction in the membrane potential (n=5/5). **(D)** Chemogenetic inhibition of 5-HT<sub>2C</sub>R<sup>NTS</sup> neurons via CNO (1 mg/kg, i.p.) administration in 5-HT<sub>2C</sub>R<sup>NTS</sup>-hM4Di mice did not alter food intake compared to saline up to 24 hours post-treatment (n= 6-7; 3h: t(11)=0.044, p=0.965; 5h: t(11)=0.038, p=0.970; 24h: t(11)=0.642, p=0.533). Data are presented as mean±SEM.

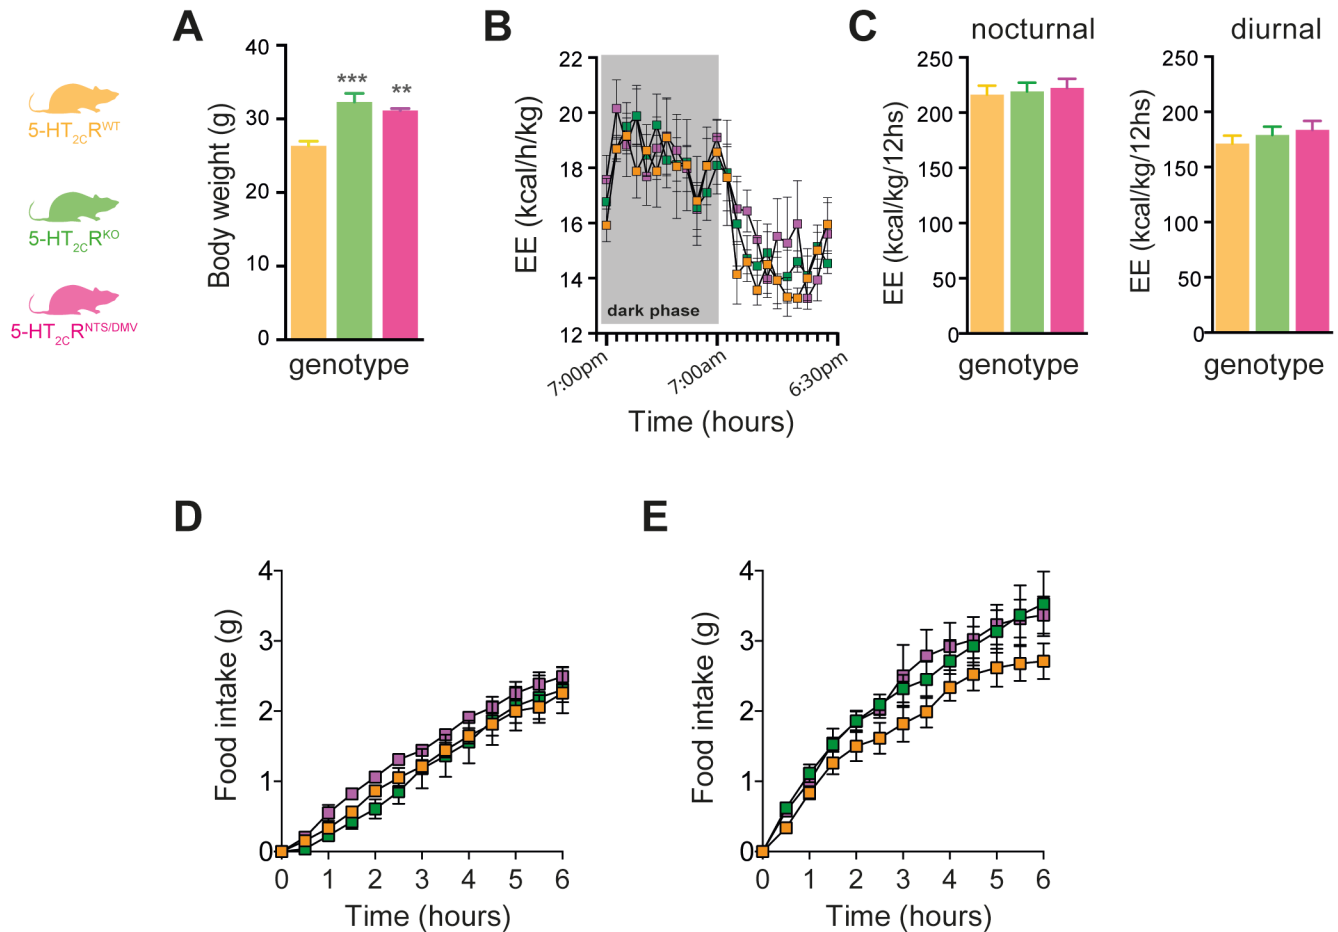

**Figure S2, related to Figure 2.** (A) Body weight of 4 month old male wild type ( $5-HT_{2C}R^{WT}$ ), *loxtb5-HT<sub>2C</sub>R* null mice ( $5-HT_{2C}R^{KO}$ ) and *loxtb5-HT<sub>2C</sub>R* null mice with 5-HT<sub>2C</sub>R<sub>s</sub> exclusively restored within the NTS/DMV following stereotaxic delivery of AAV-hSyn-Cre-mCherry into the NTS/DMV ( $5-HT_{2C}R^{NTS/DMV}$ ) (n=5-6 per group,  $F_{2,16} = 14.40$ ,  $p = 0.0003$ ). (B) Representative recording of circadian energy expenditure (EE) measured by indirect calorimetry illustrating no effect of genotype on EE (kcal/h/kg) during the dark or light phase of the daily cycle in  $5-HT_{2C}R^{WT}$  (n=5),  $5-HT_{2C}R^{KO}$  (n=5) or  $5-HT_{2C}R^{NTS/DMV}$  (n=6) mice (Effect of genotype  $F_{2,13} = 0.26$ ,  $p = 0.7739$ ; effect of time  $F_{23,299} = 15.56$ ,  $p < 0.001$ ; interaction  $F_{46,299} = 0.66$ ,  $p = 0.9544$ ); (C) Data expressed as cumulative nocturnal and diurnal EE also illustrate no differences by genotype in EE. (D) Cumulative *ad libitum* dark cycle food intake illustrating no differences by genotype. (E) Cumulative light cycle food intake after an overnight fast illustrating no significant differences by genotype. Sidak's post hoc comparisons \*\* $p < 0.01$ , \*\*\* $p < 0.001$  compared to  $5-HT_{2C}R^{WT}$  mice. Data are presented as mean  $\pm$  SEM.
